# Supplementary material for: Efficient solvent-controlled crystallization of pure polymorphs of 1-nitro-4-(4-nitrophenylmethylthio)benzene
Source: Royal Society of Chemistry journal article supplement (doi:10.1039/c4ce00753k), 2014-06-20
Supplement: c4ce00753k1.pdf [file c4ce00753k1.pdf]

## *Supporting Information*

---

### **Efficient Solvent-Controlled Crystallization of Pure Polymorphs of 1-Nitro-4-(4-nitrophenylmethylthio)benzene**

Chong-Qing Wan<sup>a\*</sup>, Ai-Min Li<sup>a</sup>, Shaeel A. Al-Thabaiti<sup>b</sup>, Thomas C. W. Mak<sup>b,c</sup>

*[a] Beijing Key Laboratory for Optical Materials and Photonic Devices, Department of Chemistry, Capital Normal University, Beijing 100048, P. R. China. [b] Department of Chemistry, Faculty of Science, King Abdulaziz University, Jeddah 21589, Saudi Arabia. [c] Department of Chemistry, The Chinese University of Hong Kong, Shatin, New Territories, Hong Kong SAR, P. R. China.*

\*Author for correspondence: Chong-Qing Wan, email: [wancq@cnu.edu.cn](mailto:wancq@cnu.edu.cn)

## Supporting Information

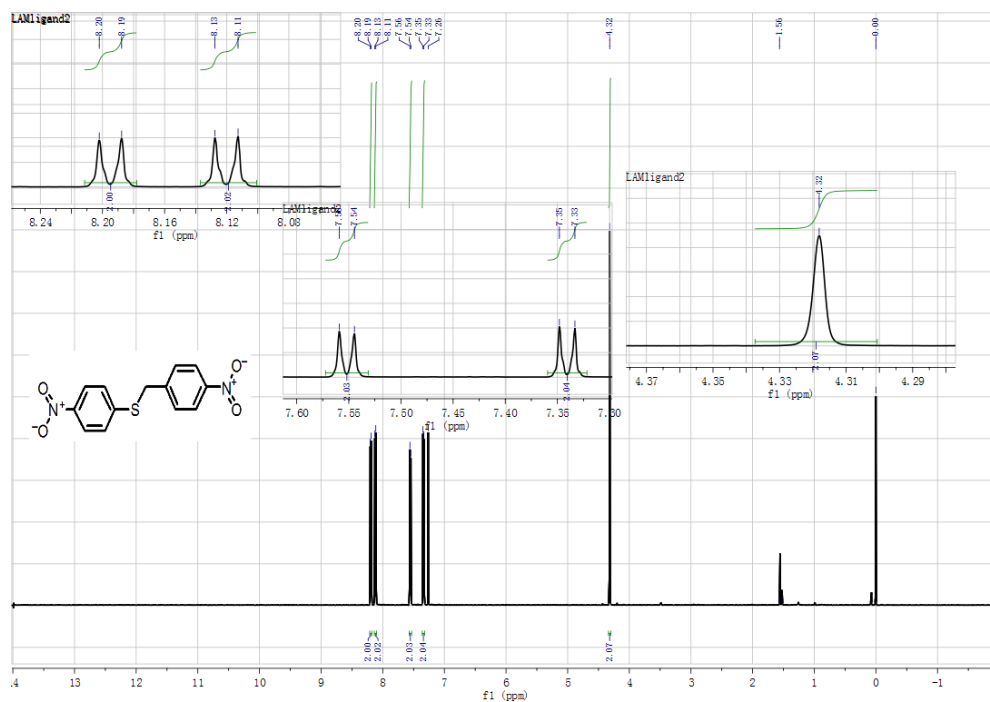

**Figure S1.** <sup>1</sup>H-NMR spectrum of NNB.

**Table S1.** Summary of crystallization methods for I-IV and the monohydrate of NNB.

| Solvent                                                                                             | Volume ratio | Procedure                                                                     | Product  |
|-----------------------------------------------------------------------------------------------------|--------------|-------------------------------------------------------------------------------|----------|
| H <sub>2</sub> O ( <i>protic polar</i> )                                                            | 1            | Cooling the hot solution to room temperature and slow evaporation the solvent | Form I   |
| CH <sub>3</sub> OH ( <i>protic polar</i> )                                                          | 1            | As above                                                                      | Form I   |
| CH <sub>3</sub> CH <sub>2</sub> OH ( <i>protic polar</i> )                                          | 1            | As above                                                                      | Form I   |
| 1-Butanol ( <i>protic polar</i> )                                                                   | 1            | As above                                                                      | Form I   |
| CH <sub>2</sub> Cl <sub>2</sub> ( <i>aprotic polar</i> )/CH <sub>3</sub> OH ( <i>protic polar</i> ) | 3:1          | Slow evaporation of a mixed solvent at room temperature                       | Form I   |
| CH <sub>2</sub> Cl <sub>2</sub> ( <i>aprotic polar</i> )/Ethyl acetate ( <i>aprotic polar</i> )     | 3:1          | As above                                                                      | Form I   |
| Ethyl acetate ( <i>aprotic polar</i> )                                                              | 1            | Slow evaporation of a neat solvent at room temperature                        | Form I   |
| Acetone ( <i>aprotic polar</i> )                                                                    | 1            | As above                                                                      | Form I   |
| Toluene ( <i>non-polar</i> )                                                                        | 1            | As above                                                                      | Form II  |
| THF ( <i>aprotic polar</i> )                                                                        | 1            | As above                                                                      | Form III |
| CH <sub>2</sub> Cl <sub>2</sub> ( <i>aprotic polar</i> )                                            | 1            | As above                                                                      | Form III |
| CHCl <sub>3</sub> ( <i>aprotic polar</i> )                                                          | 1            | As above                                                                      | Form III |
| Acetonitrile ( <i>aprotic polar</i> )                                                               | 1            | As above                                                                      | Form III |

## Supporting Information

|                                                                                           |     |                                                                                                                                                            |          |
|-------------------------------------------------------------------------------------------|-----|------------------------------------------------------------------------------------------------------------------------------------------------------------|----------|
| 1,4-Dioxane ( <i>non-polar</i> )                                                          | 1   | As above                                                                                                                                                   | Form III |
| n-Hexane ( <i>non-polar</i> )                                                             | 1   | Cooling the hot solution to room temperature and slow evaporation of the solvent                                                                           | Form III |
| Benzene ( <i>Nonpolar</i> )                                                               | 1   | As above                                                                                                                                                   | Form III |
| CH <sub>2</sub> Cl <sub>2</sub> ( <i>aprotic polar</i> )/Acetone ( <i>polar aprotic</i> ) | 3:1 | Dissolving NNB in the mixed solvent sealed in a Teflon-lined reactor, and heating at 80°C for 7 days, then cooling at a rate of 10°C/h to room temperature | Form IV  |
| DMF ( <i>aprotic polar</i> )                                                              | 1   | Slow evaporation of a solution at room temperature for about three weeks                                                                                   | Hydrate  |

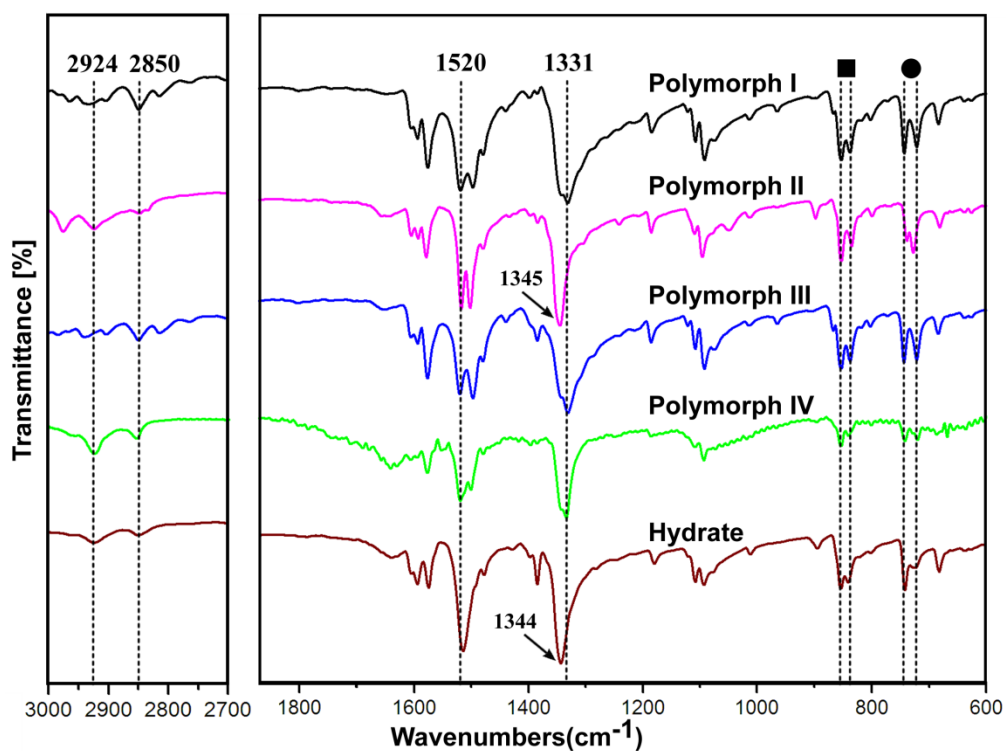

**Figure S2** FT-IR spectra of I-IV and the monohydrate forms. ● and ■ indicate the double bands of 835~853 cm<sup>-1</sup> and 721~742 cm<sup>-1</sup> ranges, respectively.

## Supporting Information

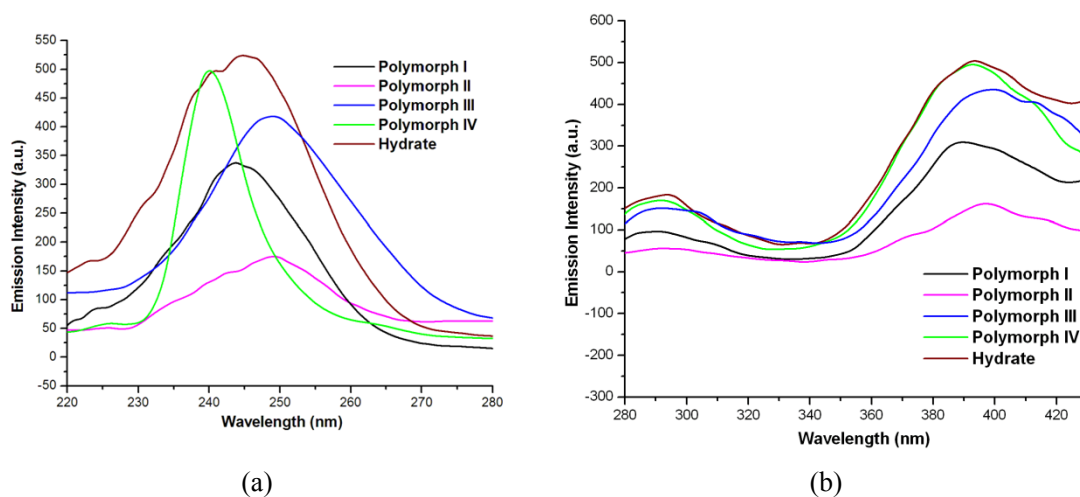

**Figure S3** Fluorescence excitation (a) and emission spectra (b) of polymorph I-IV and the monohydrate.

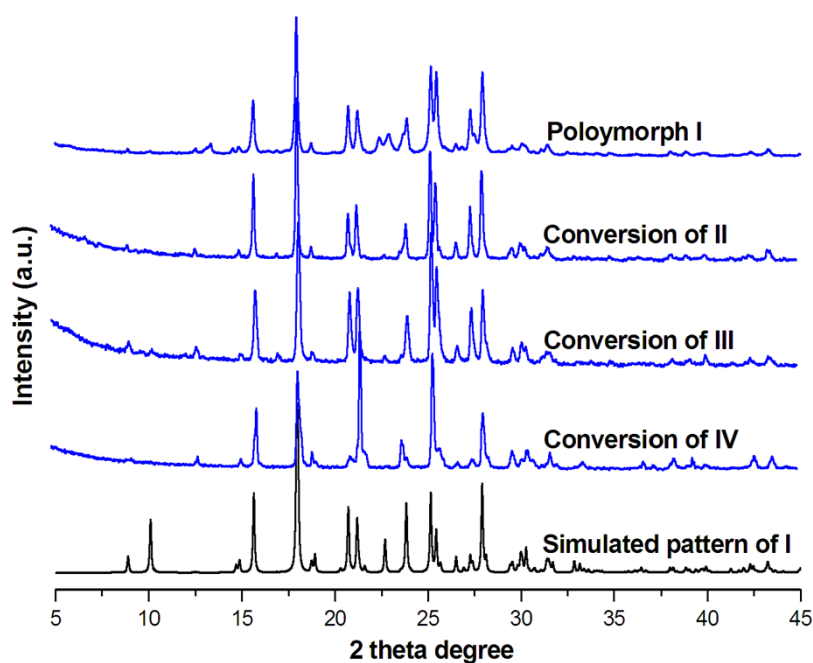

**Figure S4** Powder X-ray diffraction measurements of the solid phase conversions of polymorphs II-IV (blue) after heated at 85°C for one day. The experimental and simulated patterns of form I were shown in comparison.

## Supporting Information

**Table S2.** Crystallographic data of polymorphs **I–IV** and monohydrate

| Compound                                                                  | <b>I</b>                                                        | <b>II</b>                                                       | <b>III</b>                                                      | <b>IV</b>                                                       | <b>Monohydrate</b>                                              |   |                                                                                                                                    |   |            |          |                          |
|---------------------------------------------------------------------------|-----------------------------------------------------------------|-----------------------------------------------------------------|-----------------------------------------------------------------|-----------------------------------------------------------------|-----------------------------------------------------------------|---|------------------------------------------------------------------------------------------------------------------------------------|---|------------|----------|--------------------------|
| Empirical formula                                                         | C <sub>13</sub> H <sub>10</sub> N <sub>2</sub> O <sub>4</sub> S | C <sub>13</sub> H <sub>10</sub> N <sub>2</sub> O <sub>4</sub> S | C <sub>13</sub> H <sub>10</sub> N <sub>2</sub> O <sub>4</sub> S | C <sub>13</sub> H <sub>10</sub> N <sub>2</sub> O <sub>4</sub> S | C <sub>13</sub> H <sub>12</sub> N <sub>2</sub> O <sub>5</sub> S |   |                                                                                                                                    |   |            |          |                          |
| Formula weight                                                            | 290.29                                                          | 290.29                                                          | 290.29                                                          | 290.29                                                          | 308.29                                                          |   |                                                                                                                                    |   |            |          |                          |
| Crystal size                                                              | 0.35×0.30×0.25                                                  | 0.35×0.20×0.15                                                  | 0.35×0.30×0.25                                                  | 0.25×0.20×0.15                                                  | 0.35×0.30×0.25                                                  |   |                                                                                                                                    |   |            |          |                          |
| Crystal system                                                            | Monoclinic                                                      | Monoclinic                                                      | Monoclinic                                                      | Triclinic                                                       | Monoclinic                                                      |   |                                                                                                                                    |   |            |          |                          |
| Space group                                                               | <i>P2<sub>1</sub>/c</i> (No. 14)                                | <i>P2<sub>1</sub>/c</i> (No. 14)                                | <i>C2/c</i> (No. 15)                                            | <i>P-1</i> (No. 2)                                              | <i>P2<sub>1</sub>/c</i> (No. 14)                                |   |                                                                                                                                    |   |            |          |                          |
| <i>a</i> (Å)                                                              | 6.1653(7)                                                       | 4.0558(3)                                                       | 24.4212(6)                                                      | 13.1030(7)                                                      | 3.9606(3)                                                       |   |                                                                                                                                    |   |            |          |                          |
| <i>b</i> (Å)                                                              | 17.4934(18)                                                     | 20.4472(16)                                                     | 8.3161(2)                                                       | 13.8660(8)                                                      | 12.1751(8)                                                      |   |                                                                                                                                    |   |            |          |                          |
| <i>c</i> (Å)                                                              | 12.4757(13)                                                     | 16.1833(12)                                                     | 13.2973(4)                                                      | 15.6862(10)                                                     | 31.027(2)                                                       |   |                                                                                                                                    |   |            |          |                          |
| $\alpha$ (°)                                                              | 90.00                                                           | 90.00                                                           | 90.00                                                           | 81.809(4)                                                       | 90.00                                                           |   |                                                                                                                                    |   |            |          |                          |
| $\beta$ (°)                                                               | 104.928(7)                                                      | 102.878(5)                                                      | 92.341(2)                                                       | 71.861(3)                                                       | 93.629(3)                                                       |   |                                                                                                                                    |   |            |          |                          |
| $\gamma$ (°)                                                              | 90.00                                                           | 90.00                                                           | 90.00                                                           | 79.628(3)                                                       | 90.00                                                           |   |                                                                                                                                    |   |            |          |                          |
| <i>V</i> (Å <sup>3</sup> )                                                | 1300.1(2)                                                       | 1308.32(17)                                                     | 2698.28(12)                                                     | 2652.7(3)                                                       | 1493.14(18)                                                     |   |                                                                                                                                    |   |            |          |                          |
| <i>Z</i> , <i>Z</i> '                                                     | 1, 4                                                            | 1, 4                                                            | 1, 8                                                            | 4, 8                                                            | 1, 4                                                            |   |                                                                                                                                    |   |            |          |                          |
| <i>D</i> <sub>calc</sub> (g/cm <sup>3</sup> )                             | 1.483                                                           | 1.474                                                           | 1.429                                                           | 1.454                                                           | 1.363                                                           |   |                                                                                                                                    |   |            |          |                          |
| $\mu$ (Mo-K $\alpha$ ) (mm <sup>-1</sup> )                                | 0.264                                                           | 0.262                                                           | 0.254                                                           | 0.258                                                           | 0.238                                                           |   |                                                                                                                                    |   |            |          |                          |
| <i>F</i> (000)                                                            | 600                                                             | 600                                                             | 1200                                                            | 1200                                                            | 632                                                             |   |                                                                                                                                    |   |            |          |                          |
| Reflections collected                                                     | 29694                                                           | 9404                                                            | 11775                                                           | 24715                                                           | 8925                                                            |   |                                                                                                                                    |   |            |          |                          |
| Independent reflections                                                   | 3098(0.0305)                                                    | 2296 (0.0359)                                                   | 3224(0.0303)                                                    | 9332(0.1028)                                                    | 2591 (0.0225)                                                   |   |                                                                                                                                    |   |            |          |                          |
| Parameters                                                                | 200                                                             | 181                                                             | 181                                                             | 722                                                             | 201                                                             |   |                                                                                                                                    |   |            |          |                          |
| Goodness-of-fit                                                           | 1.095                                                           | 1.078                                                           | 1.000                                                           | 0.987                                                           | 1.064                                                           |   |                                                                                                                                    |   |            |          |                          |
| <i>R</i> <sub>1</sub> [ <i>I</i> > 2 $\sigma$ ( <i>I</i> ) ] <sup>a</sup> | 0.0788                                                          | 0.0489                                                          | 0.0461                                                          | 0.0877                                                          | 0.0576                                                          |   |                                                                                                                                    |   |            |          |                          |
| <i>wR</i> <sub>2</sub> (all data) <sup>b</sup>                            | 0.2695                                                          | 0.1365                                                          | 0.1494                                                          | 0.2893                                                          | 0.1888                                                          |   |                                                                                                                                    |   |            |          |                          |
| <sup>a</sup> <i>R</i> <sub>1</sub>                                        | =                                                               | $\sum   F_o $                                                   | –                                                               | $ F_c / \sum F_o $ .                                            | <sup>b</sup> <i>wR</i> <sub>2</sub>                             | = | $\{\sum[w(F_o^2$ <td>–</td> <td><math>F_c^2)^2</math></td> <td>/<math>\sum</math></td> <td><math>[w(F_o^2)^2]\}^{1/2}</math>.</td> | – | $F_c^2)^2$ | / $\sum$ | $[w(F_o^2)^2]\}^{1/2}$ . |

## *Supporting Information*

---
